# Supplementary material for: Study of Cis-regulatory Elements in the Ascidian Ciona intestinalis
Source: PubMed Central journal article supplement (PMC3580780; doi:10.2174/138920213804999192), 2013-03
Supplement: CG-14-56_SD1.pdf [file CG-14-56_SD1.pdf]

**Table S1. Experimentally Verified *cis*-regulatory Elements in *Ciona intestinalis*. Data Derived from Comparison of the *C. intestinalis* Genome v.1 or v.2 As Noted [1] and Gene Models and *cis*-regulatory Information from the ANISEED Database [2] and Other References As Noted**

| Ciona gene                      | Gene model              | Genome | Trx. start site                         | GRE | Locus           | Mean distance to TSS | Expression pattern                                 | Reference           |
|---------------------------------|-------------------------|--------|-----------------------------------------|-----|-----------------|----------------------|----------------------------------------------------|---------------------|
| <i>Ci-achaete-scute-a-like2</i> | ci0100148570            | v.1    | scaffold_667: 25699                     | A   | 24704-25641     | -0.53                | anterior ant. sens. ves., mesenchyme, tail muscles | Y. Ohtsuka, ANISEED |
| <i>Ci-ADMP</i>                  | KH.C2.421.v1.A.nonSL4-1 | v.2    | scaffold_213: 107269                    | A   | 106593-107007   | -0.47                | CNS, epidermis, mesoderm                           | ANISEED             |
| <i>Ci-AP2-like2</i>             | KH.C7.43.v1.A.nonSL1-1  | v.1    | scaffold_107: 140192                    | A   | 141387-141664   | -1.33                | tail epidermis                                     | ANISEED             |
| <i>Ci-AP4</i>                   | KH.C14.448.v1.A.ND1-1   | v.1    | scaffold_73: 110517                     | A   | 109928-110292   | +0.41                | mesenchyme, muscle                                 | Y. Ohtsuka, ANISEED |
|                                 |                         |        |                                         | B   | 110613-110767   | -0.17                | mesenchyme, muscle                                 |                     |
| <i>Ci-Brachyury</i>             | ci0100134430            | v.2    | scaffold_162: 25953                     | A   | 25588-25953     | -0.21                | notochord                                          | [3]                 |
| <i>Ci-chordin</i>               | KH.C6.145.v1.A.ND1-1    | v.1    | scaffold_8: 356794                      | A   | 356873-357169   | -9.6                 | CNS, mesoderm                                      | ANISEED             |
| <i>Ci-COE</i>                   | ci0100133553            | v.1    | scaffold_229: 99269                     | A   | 108589-109151   | -0.23                | mesenchyme, muscle                                 | [4]                 |
| <i>Ci-Delta2</i>                | KH.L50.6.v1.A.SL1-1     | v.1    | scaffold_170: 33066                     | A   | 32545-33133     | -0.23                | epidermis, siphon primordia, TLCs, TVCs            | Y. Ohtsuka, ANISEED |
| <i>Ci-derriere-like</i>         | KH.C4.547.v1.A.nonSL2-1 | v.1    | scaffold_123: 191879                    | A   | 191627-191803   | -0.16                | epidermis                                          | [4]                 |
| <i>Ci-DlIA</i>                  | KH.C7.346.v1.A.SL1-1    | v.2    | chr_07q: 1163893                        | A   | 1162089-1163705 | -0.41                | anterior neuroectoderm at tailbud stage            | [5]                 |
| <i>Ci-DlIB</i>                  | KH.C7.243.v1.A.ND1-1    | v.2    | chr_07q: 1170654                        | A   | 1170826-1171284 | -0.40                | pan-animal hemisphere at gastrula stage            | [6]                 |
| <i>Ci-DMRT1</i>                 | KH.S544.3.v1.A.nonSL2-1 | v.2    | chr_05q: 5020647<br>use v1 for gene map | A   | 5020616-5021001 | -0.16                | CNS, mesenchyme, tail muscles, palps               | [4]                 |
| <i>Ci-ELKI</i>                  | KH.C8.247.v2.A.SL2-1    | v.1    | scaffold_3: 773886                      | A   | 773052-773898   | -0.41                | CNS, notochord, muscles, endoderm                  | [4]                 |
|                                 |                         |        |                                         | B   | 777331-777667   | +3.61                | mesenchyme, b-epidermis, nerve cord and b-muscle   |                     |
|                                 |                         |        |                                         | C   | 781042-781175   | +7.22                | a6.5 & b6.5 at 110-cell stage                      |                     |
| <i>Ci-Emx</i>                   | ci0100151065            | v.1    | scaffold_402: 9128                      | A   | 9240-9653       | -0.32                | silencer                                           | [4]                 |
| <i>Ci-EphrinA-c</i>             | KH.C3.52.v1.A.SL2-1     | v.1    | scaffold_208: 134793                    | A   | 134817-135556   | -0.39                | head endoderm, notochord                           | [4]                 |
| <i>Ci-EphrinA-d</i>             | KH.C3.716.v1.A.SL1-1    | v.1    | scaffold_208: 140900                    | A   | 140976-141642   | -0.41                | ectoderm and mesenchyme                            | [4]                 |
| <i>Ci-ERF-a</i>                 | KH.C4.366.v1.A.ND1-1    | v.1    | scaffold_6: 551867                      | A   | 562958-563160   | -11.19               | a6.5 & b6.5                                        | [4]                 |

| Ciona gene           | Gene model              | Genome       | Trx. start site                  | GRE | Locus                         | Mean distance to TSS | Expression pattern                            | Reference |
|----------------------|-------------------------|--------------|----------------------------------|-----|-------------------------------|----------------------|-----------------------------------------------|-----------|
| <i>Ci-ets</i>        | KH.C10.113.v1.A.SL1-1   | v.1          | scaffold_344: 72641              | A   | 71681-72434                   | -0.58                | tail muscles, mesenchyme, part of brain       | [4]       |
| <i>Ci-Ets97D</i>     | ci0100130209            | v.1          | scaffold_28: 55481               | A   | 53642-54159                   | -1.58                | mesenchyme, notochord                         | [4]       |
| <i>Ci-Eya</i>        | ci0100137801            | v.1          | scaffold_368: 2214*              | A   | 4544-5782                     | +2.95                | epidermis, mesench., neurohyp., palps         | [7]       |
| <i>Ci-fog</i>        | ci0100149797            | v.1          | scaffold 9: 331369               | A   | 331487-331828                 | -0.29                | pan-animal hemisphere at 32-cell stage        | [8]       |
| <i>Ci-FoxAa</i>      | KYOTOGRAI L2005.63.50.1 | v.1          | scaffold_63: 269243              | A   | 269751-269811                 | -0.54                | lateral CNS                                   | [9] & [2] |
|                      |                         |              |                                  | B   | 270101-270571                 | -1.09                | CNS                                           |           |
|                      |                         |              |                                  | C   | 270572-270830                 | -1.49                | autoregulation                                |           |
|                      |                         |              |                                  | D   | 270831-270971                 | -1.66                | notochord & endoderm                          |           |
|                      |                         |              |                                  | E   | 270971-271801                 | -2.14                | ectopic epidermis                             |           |
| <i>Ci-FoxB</i>       | ci0100145669            | v.2<br>(v.1) | chr_04q: 4634207 (sc_129: 70240) | A   | 4630261-4630689 (73762-74192) | -3.73                | notochord, epidermis                          | [4]       |
|                      |                         |              |                                  | B   | 4633083-4633346 (71106-71369) | -0.99                | mesenchyme, neck, muscle, visc. ganglion      |           |
| <i>Ci-FoxC</i>       | KH.L57.25.v1.A.SL1-1    | v.1          | scaffold_333: 73634              | A   | 73706-74127                   | -0.28                | palps, sensory vesicle                        | [4]       |
| <i>Ci-FoxD</i>       | ci0100146995            | v.2          | chr_08q: 2997576                 | A   | 2996334-2996492               | -1.16                | A5.1, A5.2, B5.1 lineages                     | [10]      |
| <i>Ci-FoxF</i>       | KH.C3.170.v1.A.SL1-1    | v.1          | scaffold_56: 139736              | A   | 138750-138963                 | -0.88                | trunk ventral cells at tailbud stage          | [11]      |
| <i>Ci-FoxN2/3</i>    | KH.L13.24.v1.A.SL1-1    | v.1          | scaffold_160: 140569             | A   | 138298-138668                 | -2.09                | mesenchyme, tail muscles                      | [4]       |
|                      |                         |              |                                  | B   | 139364-140470                 | -0.65                | CNS, mesenchyme, epidermis                    |           |
| <i>Ci-orphanFoxl</i> | KH.C14.520.v1.A.ND1-1   | v.1          | scaffold_73: 311622              | A   | 314878-315158                 | -3.4                 | mesenchyme                                    | [4]       |
| <i>Ci-GATAb</i>      | KH.S696.1.v1.A.ND1-1    | v.2          | scaffold_95: 471757              | A   | 469845-470050                 | -1.81                | a-line ectoderm                               | [4]       |
|                      |                         |              |                                  | B   | 470580-470781                 | -1.08                | mesenchyme                                    |           |
| <i>Ci-Hes-a</i>      | KH.L34.9.v1.A.ND2-1     | v.1          | scaffold_275: 72799              | A   | 74194-74407                   | -1.5                 | head endoderm, endodermal strand, epidermis   | [4]       |
| <i>Ci-Hndx</i>       | ci0100140298            | v.2          | chr_01q: 4071779                 | A   | 4071838-4074717               | -1.5                 | endoderm, trunk lateral & trunk ventral cells | [12]      |

| Ciona gene           | Gene model              | Genome | Trx. start site     | GRE | Locus           | Mean distance to TSS | Expression pattern                                | Reference |
|----------------------|-------------------------|--------|---------------------|-----|-----------------|----------------------|---------------------------------------------------|-----------|
| <i>Ci-Hox1</i>       | KHL171.16.v1.A.SL2-1    | v.1    | scaffold_148:187453 | A   | 185772-183869*  | +2.63                | epidermis, neural tube                            | [13]      |
|                      |                         |        |                     | B   | 187959-187795   | -0.42                | RA response element                               |           |
| <i>Ci-Hox3</i>       | KH.C1.38.v2.A.SL2-1     | v.1    | scaffold_87:133201  | A   | 133815-133895   | -1.91                | brain                                             | [14]      |
| <i>Ci-Irx-B</i>      | KH.C11.485.v1.A.SL1-1   | v.1    | scaffold_12:254812  | A   | 256394-257214   | -1.99                | endoderm, palps, tail epidermis                   | [4]       |
| <i>Ci-KLF1/2/4</i>   | KH.C5.154.v1.A.ND1-1    | v.2    | scaffold_86:294192  | A   | 294494-295143   | -0.63                | endodermal strand, mesenchyme, tail muscles       | [4]       |
| <i>Ci-Lhx3</i>       | ci0100130659            | v.2    | chr_13q:2001122     | A   | 2005216-2005510 | -4.24                | mesenchyme (B8.5 & B7.7 lines), muscle            | [4]       |
| <i>Ci-meis</i>       | KH.C10.174.v1.A.SL2-1   | v.1    | scaffold_38:68952   | A   | 62492-66776     | -4.32                | sensory vesicle, tail muscle                      | [15]      |
| <i>Ci-mesp</i>       | ci0100138454            | v.2    | chr_03q:2495630     | A   | 2495593-2495781 | -0.06                | B7.5 cells at 112-cell stage                      | [16]      |
| <i>Ci-Msxb</i>       | KYOTOGRAIL2005.29.6.1   | v.2    | chr_02q:6152285     | A   | 6152058-6152201 | -0.16                | CNS                                               | [17]      |
|                      |                         |        |                     | B   | 6151828-6152058 | -0.34                | pharynx                                           |           |
|                      |                         |        |                     | C   | 6149739-6151467 | -1.68                | ventral epidermis                                 |           |
| <i>Ci-neurogenin</i> | KH.C6.129.v1.A.nonSL6-1 | v.1    | scaffold_8:77488    | A   | 77550-77932     | -0.25                | nerve cord, muscle, mesenchyme                    | [4]       |
| <i>Ci-Nodal</i>      | KHL106.16.v1.A.SL1-1    | v.1    | scaffold_490:16680  | A   | 18759-18940     | -2.17                | notochord, tail epidermis, ventral head epidermis | [4]       |
|                      |                         |        |                     | B   | 18415-18561     | -1.81                | b8.17, b8.18, b8.19, b8.20 at 112-cell stage      |           |
| <i>Ci-NPP</i>        | KH.C2.514.v2.A.ND1-2    | v.1    | scaffold_240:82362  | A   | 83459-82403     | -0.57                | head endoderm. TVCs                               | [12]      |
| <i>Ci-Otx</i>        | KH.C4.84.v2.A.SL4-1     | v.2    | chr_04a:4277070     | A   | 4278481-4278604 | -1.47                | neuroectoderm from 32-cell stage ("a-element")    | [18]      |
| <i>Ci-paraxis</i>    | KH.S781.11.v1.A.SL1-1   | v.1    | scaffold_781:19180  | A   | 18941-19081     | -0.17                | primary muscle lineage                            | [19]      |
| <i>Ci-Pax6</i>       | KH.C9.68.v1.A.ND1-1     | v.2    | chr_09q:3323726     | A   | 3321375-3321811 | -2.13                | nerve cord & sensory vesicle amplifier            | [20]      |
|                      |                         |        |                     | B   | 3321812-3322012 | -1.81                | sensory vesicle                                   |           |
|                      |                         |        |                     | C   | 3324100-3325800 | +1.22                | photoreceptors & nerve cord amplifier             |           |
|                      |                         |        |                     | D   | 3327800-3329900 | +5.12                | ectopic repression                                |           |
| <i>Ci-Pitx</i>       | KHL153.79.v2.A.SL2-1    | v.1    | scaffold_121:181422 | A   | 170509-170703   | -10.82               | neurohypophysis                                   | [21]      |

| Ciona gene              | Gene model               | Genome | Trx. start site                                         | GRE | Locus           | Mean distance to TSS | Expression pattern                                                                         | Reference |
|-------------------------|--------------------------|--------|---------------------------------------------------------|-----|-----------------|----------------------|--------------------------------------------------------------------------------------------|-----------|
|                         |                          |        |                                                         | B   | 183532-183691*  | +2.19                | epidermis                                                                                  |           |
| <i>Ci-RAR</i>           | KH.C9.580.v2.A.SL1-1     | v.2    | chr_09q:1244192                                         | A   | 1244386-1244486 | -0.24                | muscle                                                                                     | [22]      |
|                         |                          |        |                                                         | B   | 1244637-1244979 | -0.62                | CNS                                                                                        |           |
|                         |                          |        |                                                         | C   | 1244980-1245493 | -1.04                | epidermis ("E element")                                                                    |           |
| <i>Ci-Rora</i>          | KH.C8.101.v1.A.ND2-1     | v.2    | chr_08q:3106486                                         | A   | 3107026-3107144 | -0.60                | a-line ectoderm at gastrula stage ("AS2")                                                  | [23]      |
| <i>Ci-Rorb</i>          | KH.C8.737.v1.A.SL1-1     | v.2    | chr_08q:3083185                                         | A   | 3083629-3083788 | -0.52                | a-line ectoderm at gastrula stage ("BS1")                                                  | [23]      |
|                         |                          |        |                                                         | B   | 3082245-3082494 | +0.82                | a-line neural ectoderm gastrula stage ("BS4")                                              |           |
|                         |                          |        |                                                         | C*  | 3084832-3078865 | -1.34                | neural gland of adult & early repressors ("BL")                                            |           |
| <i>Ci-Rx</i>            | KH.C12.152.v1.A.SL1-1    | v.1    | scaffold_84:162648                                      | A   | 163276-163080   | -0.53                | CNS                                                                                        | [24]      |
| <i>Ci-sFRP1/5</i>       | KYOTOGRAIL2005.148.4.1   | v.1    | scaffold_148:32589                                      | A   | 33924-34041     | -1.39                | anterior gastrula ectoderm                                                                 | [25]      |
| <i>Ci-sna</i>           | KH.C3.751.v1.C.SL1-1     | v.2    | chr_03q:4125486                                         | A   | 4125656-4126157 | -0.42                | B4.1 lineage                                                                               | [26]      |
| <i>Ci-SoxB1</i>         | KH.C1.99.v1.A.SL1-1      | v.1    | scaffold_92:251079                                      | A   | 251295-251584   | -0.36                | ectoderm                                                                                   | [4]       |
|                         |                          |        |                                                         | B   | 252621-252990   | -1.73                | mesenchyme                                                                                 |           |
| <i>Ci-SoxC</i>          | KH.C7.523.v1.A.SL1-1     | v.2    | chr_07q:3615183                                         | A   | 3614302-3614949 | -0.56                | mesenchyme, muscle, epidermis (only midline), epidermal neurons, palps and a part of brain | [4]       |
| <i>Ci-Tbx6b</i>         | KH.S654.3.v1.A.nonSL1-1  | v.1    | scaffold_654:26946                                      | A   | 27239-27383     | -0.37                | muscle??                                                                                   | [19]      |
| <i>Ci-TTF1 (Nkx2-1)</i> | KH.C10.338.v1.A.nonSL1-1 | v.1    | scaffold_371:37135                                      | A   | 36583-36807     | -0.44                | endoderm                                                                                   | [27]      |
| <i>Ci-Trim2/3</i>       | KH.C8.863.v1.A.SL1-1     | v.1    | scaffold_1:627630<br>need to update gene model on Vista | A   | 627756-627878   | +0.19                | anterior neural precursors (weak)                                                          | [4]       |
| <i>Ci-Unc4A</i>         | KH.C5.34.v1.A.SL1-1      | v.1    | scaffold_50:113746                                      | A   | 108889-108759   | -4.92                | notochord                                                                                  | [4]       |
| <i>Ci-Wnt5</i>          | KH.L152.45.v1.A.SL1-1    | v.1    | scaffold_248:119170                                     | A   | 118387-118506   | -0.72                | muscle precursors                                                                          | [4]       |
| <i>Ci-ZicL-B</i>        | ci0100145774             | v.1    | scaffold_577:39659                                      | A   | 39700-39997     | -0.19                | A6.2 & A6.4 lineages                                                                       | [28]      |
|                         |                          |        |                                                         | B   | 39998-          | -0.57                | B6.2 & B6.4                                                                                |           |

| Ciona gene             | Gene model              | Genome | Trx. start site                       | GRE | Locus         | Mean distance to TSS | Expression pattern                                     | Reference |
|------------------------|-------------------------|--------|---------------------------------------|-----|---------------|----------------------|--------------------------------------------------------|-----------|
|                        |                         |        |                                       |     | 40451         |                      | lineages & later A-line notochord, nerve cord & muscle |           |
| <i>Ci-Znf(C2H2)-24</i> | KH.C5.154.v1.A.ND1-1    | v.1    | scaffold_86:294192                    | A   | 294494-295143 | -0.63                | mesenchyme, endodermal strand, muscle                  | [4]       |
| <i>Ci-Znf(C3H)</i>     | KH.C4.182.v1.A.nonSL3-1 | v.2    | chr_14q:884369<br>use v1 for gene map | A   | 884346-884581 | -0.09                | CNS, mesenchyme, notochord, tail muscles, palps        | [4]       |

\* This element not shown on alignment.

**Table S2. Experimentally Verified *cis*-regulatory Elements in Mouse. Data Were Derived from the References Noted**

| Mouse gene   | CRE name | 5' end | 3' end | Mean distance to TSS | Expression pattern          | Notes | Reference |
|--------------|----------|--------|--------|----------------------|-----------------------------|-------|-----------|
| <i>Dll1</i>  | msdII    | -0.8   | -0.08  | -0.44                | Somites                     |       | [29]      |
|              | H2       | -1.16  | -1.0   | -1.08                | Dors. sp. cord              |       |           |
|              | msd      | -12.76 | -1.16  | -6.96                | Somites                     |       |           |
|              | H1       | -3.04  | -2.76  | -2.9                 | Vent. sp. cord, sp. ganglia |       |           |
| <i>Dlx1</i>  | URE1     | -17.6  | -17    | -17.3                | not described               | 1     | [30]      |
|              | URE2     | -12.9  | -12    | -12.45               | Forebrain                   |       |           |
|              | I12a     | +6.4   | +6.95  | +6.68                | Branchial arches            |       | [31]      |
|              | I12b     | +8.4   | +8.8   | +8.6                 | Forebrain                   |       |           |
| <i>Fgf3</i>  | n/a      | -12.76 | -7.1   | -9.93                | Brain, ectoderm, ganglia    |       | [32]      |
| <i>Foxa2</i> | NE       | -14    | -13.5  | -13.75               | Notochord                   |       | [33]      |
|              | FPE      | +9.5   | +10.0  | +9.75                | Floor plate                 |       | [34]      |
| <i>Gli3</i>  | CNE1     | +26    | +26.95 | +26.48               | Brain, sp. cord, face       | 2     | [35]      |
| <i>Gata1</i> | -25/6    | -25.8  | -24.2  | -25.0                | Erythrocytes                |       | [36]      |
|              | -3.5     | -3.8   | -3.3   | -3.55                | Erythrocytes                |       |           |
|              | +3.5     | +3.2   | +3.8   | +3.5                 | Erythrocytes                |       |           |
| <i>Gata4</i> | G2       | -38.7  | -37.7  | -38.2                | Lateral mesoderm            | 5     | [37]      |
|              | G9       | -93.77 | -93.36 | -93.57               | Endocardium                 |       | [38]      |
|              | G8       | -80.95 | -80.73 | -80.84               | Endoderm                    |       | [39]      |
|              | Prox     | -0.18  | -0.07  | -0.13                | Gonads                      |       | [40]      |
| <i>Hb9</i>   | A        | -8.0   | -7.87  | -7.94                | Motor neurons               |       | [41]      |
| <i>Hoxa1</i> | I        | -6.7   | -5.3   | -6.0                 | Rhombomere 4                |       | [42]      |
|              | II       | -5.3   | -3     | -4.15                | Rhombomere 2, somites       |       |           |
|              | III      | +4.39  | +4.96  | +4.68                | Notochord, sp. cord         |       |           |
| <i>Hoxa2</i> | n.c.     | -2.3   | -1.85  | -2.08                | Neural crest                |       | [43]      |
|              | r3/5     | -2.65  | -2.3   | -2.48                | Rhombomeres 3 & 5           |       |           |
|              | exon     | +1.69  | +1.78  | +1.74                | Rhombomere 2                |       | [44]      |
| <i>Hoxa3</i> | r5/6     | -4.64  | -4.23  | -4.44                | Rhombomeres 5 & 6           |       | [45]      |

| Mouse gene    | CRE name | 5' end | 3' end | Mean distance to TSS | Expression pattern                 | Notes | Reference |
|---------------|----------|--------|--------|----------------------|------------------------------------|-------|-----------|
| <i>Hoxa7</i>  | AX470    | -2.1   | -1.6   | -1.85                | somites, sp. cord, sp. ganglia     |       | [46]      |
| <i>Hoxb1</i>  | RAIDR5   | +7.2   | +6.5   | +6.85                | RA response                        |       | [47]      |
| <i>Hoxb3</i>  | Ia       | -0.6   | -0.1   | -0.35                | Rhombomere 5                       | 4     | [48][49]  |
|               | Ib       | +1.0   | +1.4   | +1.2                 | Mesoderm                           |       |           |
|               | IIIa     | +11.9  | +12.4  | +12.15               | Hindbr. & neural crest             |       |           |
|               | IVa      | +17.4  | +17.9  | +17.65               | Rhombomere 5                       |       |           |
|               | IVb      | +18.4  | +18.9  | +18.65               | Neural and mesoderm                |       |           |
|               | Va       | +19.4  | +19.8  | +19.6                | Mesoderm                           |       |           |
| <i>Hoxb4</i>  | e        | +0.95  | +1.85  | +1.4                 | sp. cord, somites                  |       | [50]      |
|               | Λ        | +3.4   | +6.4   | +4.9                 | sp. cord                           |       |           |
|               | ENE      | +6.2   | +6.45  | +6.33                | Neural                             |       | [51]      |
|               | LNE      | +5.0   | +5.25  | +5.13                | Neural                             |       |           |
| <i>Hoxb6</i>  | early    | -2.47  | -2.22  | -2.35                | Lat. plt. mesoderm                 |       | [52]      |
| <i>Hoxc8</i>  | ENT      | -3.85  | -3.34  | -3.6                 | Sp. cord, mesoderm                 |       | [53]      |
|               | Late     | +11    | +19    | +15                  | Sp. cord, somites                  |       |           |
| <i>Hoxc9</i>  | CSE1     | +2.16  | +2.27  | +2.22                | Sp. cord                           |       | [54]      |
|               | intron   | +0.81  | +2.24  | +1.53                | Sp. cord                           |       |           |
| <i>Hoxd4</i>  | Autoreg  | -2.0   | -1.71  | -1.85                | Somites                            |       | [55]      |
|               | A        | +3.6   | +4.4   | +4.0                 | CNS                                |       | [56]      |
| <i>Msx1</i>   | DE       | -4.43  | -4.18  | -4.31                | 1st arch, nasal epithelium         |       | [57]      |
|               | PE       | -2.39  | -2.31  | -2.35                | Myotome, limb mesench., other      |       |           |
| <i>Msx2</i>   | n/a      | -3.86  | -3.30  | -3.58                | BMP response                       |       | [58]      |
|               | AER      | -0.50  | -0.44  | -0.47                | Apical ectodermal ridge            |       | [59]      |
| <i>Myf5</i>   | EEE      | -6.1   | -5.6   | -5.85                | Epaxial somites                    | 6     | [60]      |
|               | PAE      | -2.7   | -1.7   | -2.2                 | Branchial arches                   |       |           |
|               | CNSE     | -1.7   | -0.1   | -0.9                 | CNS                                |       |           |
|               | n/a      | +0.5   | +3.3   | +1.9                 | Hypaxial somites, branchial arches |       |           |
|               | Myf5-IV  | -57.7  | -55.9  | -56.8                | Myotome, limb muscles, brain       |       |           |
|               |          | -16.8  | -16.2  | -16.5                | Thoracic myotome                   |       | [61][62]  |
| <i>Myf6</i>   | n/a      | -6.5   | -5.6   | -6.05                | Epaxial myotome                    | 6     | [64]      |
|               | A17      | -8.2   | -7.6   | -7.9                 | Thoracic myotome                   |       | [65]      |
| <i>Nkx2-5</i> | n/a      | -10.7  | -8.5   | -9.6                 | Rt. ventricle                      |       | [66]      |
|               | n/a      | -5.0   | -4.0   | -4.5                 | Rt. ventricle                      |       |           |
|               | n/a      | -3.5   | -1.5   | -2.5                 | Thyroid, spleen, stomach           |       | [67]      |
| <i>Nodal</i>  | NDE      | -9.5   | -8.7   | -9.1                 | Node                               |       | [68]      |
|               | ASE      | +1.0   | +1.34  | +1.17                | Assym. in lat. plt. meso.          |       |           |
|               | LSE      | -4.5   | -4.0   | -4.25                | Left side lat. plt. meso.          |       |           |
| <i>Oct4</i>   | PE       | -1.13  | -0.89  | -1.01                | ES cells                           | 3     | [69]      |
|               | DE       | -2.1   | -1.29  | -1.70                | ES cells                           |       |           |

| Mouse gene   | CRE name    | 5' end | 3' end | Mean distance to TSS | Expression pattern               | Notes | Reference |
|--------------|-------------|--------|--------|----------------------|----------------------------------|-------|-----------|
| <i>Otx2</i>  | CNE1        | -3.1   | -2.76  | -2.93                | Visc. endo., ceph. mesench.      |       | [70][71]  |
|              | VE cis      | -1.8   | 0      | -0.9                 | Visc. endo.                      |       |           |
|              | 2           | -5.06  | -4.91  | -4.99                | Retina                           |       |           |
|              | FM          | -71.05 | -70.7  | -70.88               | Forebrain & midbrain             |       |           |
|              | FM2         | +125.6 | +126.6 | +126.1               | Forebrain & midbrain             |       |           |
|              | AN          | -91.2  | -88.9  | -90.05               | Anterior neuroectoderm           |       |           |
| <i>Pax6</i>  | A           | -4.24  | -4.0   | -4.12                | Pancreas                         |       | [72][73]  |
|              | B           | -3.81  | -3.64  | -3.73                | Lens                             |       |           |
|              | D/ $\alpha$ | +13.27 | +13.72 | +13.50               | Retina, spinal cord              |       |           |
|              | P0          | -2.35  | -1.9   | -2.13                | Retina, pancreas                 |       | [74]      |
|              | P1          | +3.45  | +3.65  | +3.55                | Photoreceptors                   |       |           |
|              | 7CE1        | +17.7  | +18.3  | +18.0                | Lens                             |       | [75]      |
|              | 7CE2        | +19.2  | +19.77 | +19.49               | Brain, heart                     |       |           |
| <i>Six1</i>  | 1-14        | -1.91  | -1.35  | -1.63                | Pre-placodal region              |       | [76]      |
| <i>Sox2</i>  |             | -4.1   | -3.3   | -3.7                 | ES cells                         |       | [77]      |
|              |             | -2.4   | -1.9   | -2.15                | ES cells                         |       |           |
|              |             | +3.6   | +4.4   | +4.0                 | ES cells                         |       |           |
| <i>Sox10</i> | MCS2        | -1.90  | -1.21  | -1.56                | Neurons, craniofac., otic ves.   |       | [78]      |
|              | MCS3        | -10.29 | -9.53  | -9.91                | Schwann cells                    |       |           |
|              | MCS4        | -29.32 | -28.51 | -28.92               | Neurons, craniofac., melanocytes |       |           |

## Notes:

- 1 - I12a & I12b enhancers located from Dlx1 TSS.
- 2 - Human elements tested in mouse (conserved in mouse sequence).
- 3 - a.k.a. *Oct3*, *Pou5f1*.
- 4 - Coordinates based on a 4-exon gene model.
- 5 - Coordinates based on NCBI37/mm9 assembly UCSC gene model.
- 6 - Some enhancers shared between *Myf5* and *Myf6* (a.k.a *MRF4*), e.g. *Myf5* -16.8 and *Myf6* -8.2 elements.

## SUPPLEMENTAL REFERENCES

- [1] Dehal, P.; Satou, Y.; Campbell, R. K.; Chapman, J.; Degnan, B.; De Tomaso, A.; Davidson, B.; Di Gregorio, A.; Gelpke, M.; Goodstein, D. M.; Harafuji, N.; Hastings, K. E. M.; Ho, I.; Hotta, K.; Huang, W.; Kawashima, T.; Lemaire, P.; Martinez, D.; Meinertzhagen, I. A.; Necula, S.; Nonaka, M.; Putnam, N.; Rash, S.; Saiga, H.; Satake, M.; Terry, A.; Yamada, L.; Wang, H. G.; Awazu, S.; Azumi, K.; Boore, J.; Branno, M.; Chin-bow, S.; DeSantis, R.; Doyle, S.; Francino, P.; Keys, D. N.; Haga, S.; Hayashi, H.; Hino, K.; Imai, K. S.; Inaba, K.; Kano, S.; Kobayashi, K.; Kobayashi, M.; Lee, B. I.; Makabe, K. W.; Manohar, C.; Matassi, G.; Medina, M.; Mochizuki, Y.; Mount, S.; Morishita, T.; Miura, S.; Nakayama, A.; Nishizaka, S.; Nomoto, H.; Ohta, F.; Oishi, K.; Rigoutsos, I.; Sano, M.; Sasaki, A.; Sasakura, Y.; Shoguchi, E.; Shin-i, T.; Spagnuolo, A.; Stainier, D.; Suzuki, M. M.; Tassy, O.; Takatori, N.; Tokuoka, M.; Yagi, K.; Yoshizaki, F.; Wada, S.; Zhang, C.; Hyatt, P. D.; Larimer, F.; Dettler, C.; Doggett, N.; Glavina, T.; Hawkins, T.; Richardson, P.; Lucas, S.; Kohara, Y.; Levine, M.; Satoh, N.; Rokhsar, D. S., The draft genome of *Ciona intestinalis*: Insights into chordate and vertebrate origins. *Science*, **2002**, 298, (5601), 2157-2167.
- [2] Tassy, O.; Dauga, D.; Daian, F.; Sobral, D.; Robin, F.; Khoueiry, P.; Salgado, D.; Fox, V.; Caillol, D.; Schiappa, R.; Laporte, B.; Rios, A.; Luxardi, G.; Kusakabe, T.; Joly, J. S.; Darras, S.; Christiaen, L.; Contensin, M.; Auger, H.; Lamy, C.; Hudson, C.; Rothbacher, U.; Gilchrist, M. J.; Makabe, K. W.; Hotta, K.; Fujiwara, S.; Satoh, N.; Satou, Y.; Lemaire, P., The ANISEED database: Digital representation, formalization, and elucidation of a chordate developmental program. *Genome Res.*, **2010**, 20, (10), 1459-1468.
- [3] Corbo, J. C.; Levine, M.; Zeller, R. W., Characterization of a notochord-specific enhancer from the *Brachyury* promoter region of the ascidian, *Ciona intestinalis*. *Development*, **1997**, 124, 589-602.
- [4] Khoueiry, P.; Rothbacher, U.; Ohtsuka, Y.; Daian, F.; Frangulian, E.; Roure, A.; Dubchak, I.; Lemaire, P., A cis-Regulatory Signature in Ascidians and Flies, Independent of Transcription Factor Binding Sites. *Curr. Biol.*, **2010**, 20, (9), 792-802.
- [5] Harafuji, N.; Keys, D. N.; Levine, M., Genome-wide identification of tissue-specific enhancers in the *Ciona* tadpole. *Proc. Natl. Acad. Sci. USA*, **2002**, 99, 6802-6805.
- [6] Irvine, S. Q.; Vierra, D. A.; Millette, B. J.; Blanchette, M. D.; Holbert, R. E., Expression of the *Distalless-B* gene in *Ciona* is regulated by a pan-ectodermal enhancer module. *Dev. Biol.*, **2011**, 353, 432-439.
- [7] Haessler, M.; Jaszczyszyn, Y.; Christiaen, L.; Joly, J. S., A cis-Regulatory Signature for Chordate Anterior Neuroectodermal Genes. *PLoS Genet.*, **2010**, 6, (4).
- [8] Rothbacher, U.; Bertrand, V.; Lamy, C.; Lemaire, P., A combinatorial code of maternal GATA, Ets and beta-catenin-TCF transcription factors specifies and patterns the early ascidian ectoderm. *Development*, **2007**, 134, (22), 4023-4032.
- [9] Di Gregorio, A.; Corbo, J.; Levine, M., The regulation of forkhead/HNF-3 beta expression in the *Ciona* embryo. *Dev. Biol.*, **2001**, 229, 31-43.

- [10] Mita, K.; Fujiwara, S., Nodal regulates neural tube formation in the *Ciona intestinalis* embryo. *Dev. Genes Evol.*, **2007**, 217, (8), 593-601.
- [11] Beh, J.; Shi, W.; Levine, M.; Davidson, B.; Christiaen, L., FoxF is essential for FGFinduced migration of heart progenitor cells in the ascidian *Ciona intestinalis*. *Development*, **2007**, 134, (18), 3297-3305.
- [12] Davidson, B.; Levine, M., Evolutionary origins of the vertebrate heart: Specification of the cardiac lineage in *Ciona intestinalis*. *Proc. Natl. Acad. Sci. USA*, **2003**, 100, (20), 11469-11473.
- [13] Kanda, M.; Wada, H.; Fujiwara, S., Epidermal expression of Hox1 is directly activated by retinoic acid in the *Ciona intestinalis* embryo. *Dev. Biol.*, **2009**, 335, (2), 454-463.
- [14] Locascio, A.; Aniello, F.; Amoroso, A.; Manzanares, M.; Krumlauf, R.; Branno, M., Patterning the ascidian nervous system: structure, expression and transgenic analysis of the *CiHox3* gene. *Development*, **1999**, 126, 4737-4748.
- [15] Sierro, N.; Kusakabe, T.; Park, K. J.; Yamashita, R.; Kinoshita, K.; Nakai, K., DBTGR: a database of tunicate promoters and their regulatory elements. *Nucleic Acids Res.*, **2006**, 34, D552-D555.
- [16] Christiaen, L.; Stolfi, A.; Davidson, B.; Levine, M., Spatio-temporal intersection of Lhx3 and Tbx6 defines the cardiac field through synergistic activation of Mesp. *Dev. Biol.*, **2009**, 328, (2), 552-560.
- [17] Russo, M.; Donizetti, A.; Locascio, A.; D'Aniello, S.; Amoroso, A.; Aniello, F.; Fucci, L.; Branno, M., Regulatory elements controlling *Ci-msxb* tissue-specific expression during *Ciona intestinalis* embryonic development. *Dev. Biol.*, **2004**, 267, 517-528.
- [18] Bertrand, V.; Hudson, C.; Caillol, D.; Popovici, C.; Lemaire, P., Neural tissue in ascidian embryos is induced by FGF9/16/20, acting via a combination of maternal GATA and Ets transcription factors. *Cell*, **2003**, 115, (5), 615-627.
- [19] Erives, A., Non-Homologous Structured CRMs from the *Ciona* Genome. *J. Comput. Biol.*, **2009**, 16, (2), 369-377.
- [20] Irvine, S. Q.; Fonseca, V. C.; Zompa, M. A.; Antony, R., Cis-regulatory organization of the Pax6 gene in the ascidian *Ciona intestinalis*. *Dev. Biol.*, **2008**, 317, (2), 649-659.
- [21] Christiaen, L.; Bourrat, F.; Joly, J. S., A modular cis-regulatory system controls isoform-specific *pitx* expression in ascidian stomodaeum. *Dev. Biol.*, **2005**, 277, (2), 557-566.
- [22] Fujiwara, S., Promoter activity of the retinoic acid receptor gene in the *Ciona intestinalis* embryo. *Dev. Dyn.*, **2005**, 232, (4), 1124-1130.
- [23] Auger, H.; Lamy, C.; Haessler, M.; Khoueiry, P.; Lemaire, P.; Joly, J. S., Similar regulatory logic in *Ciona intestinalis* for two Wnt pathway modulators, *ROR* and *SFRP-1/5*. *Dev. Biol.*, **2009**, 329, (2), 364-373.
- [24] D'Aniello, E.; Pezzotti, M. R.; Locascio, A.; Branno, M., *Onecut* is a direct neuralspecific transcriptional activator of *Rx* in *Ciona intestinalis*. *Dev. Biol.*, **2011**, 355, (2), 358-371.
- [25] Lamy, C.; Rothbacher, U.; Caillol, D.; Lemaire, P., *Ci-FoxA-a* is the earliest zygotic determinant of the ascidian anterior ectoderm and directly activates *Ci-sFRP1/5*. *Development*, **2006**, 133, (15), 2835-2844.
- [26] Erives, A.; Corbo, J. C.; Levine, M., Lineage-specific regulation of the *Ciona* *snail* gene in the embryonic mesoderm and neuroectoderm. *Dev. Biol.*, **1998**, 194, (2), 213-225.
- [27] Fanelli, A.; Lania, G.; Spagnuolo, A.; Di Lauro, R., Interplay of negative and positive signals controls endoderm-specific expression of the ascidian *Cititf1* gene promoter. *Dev. Biol.*, **2003**, 263, 12-23.
- [28] Anno, C.; Satou, A.; Fujiwara, S., Transcriptional regulation of *ZicL* in the *Ciona intestinalis* embryo. *Dev. Genes Evol.*, **2006**, 216, (10), 597-605.
- [29] Beckers, J.; Caron, A.; de Angelis, M. H.; Hans, S.; Campos-Ortega, J. A.; Gossler, A., Distinct regulatory elements direct *Delta 1* expression in the nervous system and paraxial mesoderm of transgenic mice. *Mech. Dev.*, **2000**, 95, (1-2), 23-34.
- [30] Ghanem, N.; Yu, M.; Long, J.; Hatch, G.; Rubenstein, J. L. R.; Ekker, M., Distinct cisregulatory elements from the *Dlx1/Dlx2* locus mark different progenitor cell populations in the ganglionic eminences and different subtypes of adult cortical interneurons. *Journal of Neuroscience*, **2007**, 27, (19), 5012-5022.
- [31] Ghanem, N.; Jarinova, O.; Amores, A.; Long, Q.; Hatch, G.; Park, B. K.; Rubenstein, J. L. R.; Ekker, M., Regulatory roles of conserved intergenic domains in vertebrate *Dlx* bigene clusters. *Genome Res.*, **2003**, 13, 533-543.
- [32] Powles, N.; Marshall, H.; Economou, A.; Chiang, C.; Murakami, A.; Dickson, C.; Krumlauf, R.; Maconochie, M., Regulatory analysis of the mouse *Fgf3* gene: Control of embryonic expression patterns and dependence upon sonic hedgehog (Shh) signalling. *Dev. Dyn.*, **2004**, 230, (1), 44-56.
- [33] Nishizaki, Y.; Shimazu, K.; Kondoh, H.; Sasaki, H., Identification of essential sequence motifs in the node/notochord enhancer of *Foxa2* (*Hnf3* beta) gene that are conserved across vertebrate species. *Mech. Dev.*, **2001**, 102, (1-2), 57-66.
- [34] Sasaki, H.; Hogan, B. L. M., Enhancer analysis of the mouse *HNF-3beta* gene: regulatory elements for node/notochord and floor plate are independent and consist of multiple sub-elements. *Genes Cells*, **1996**, 1, 59-72.
- [35] Abbasi, A. A.; Papparis, Z.; Malik, S.; Goode, D. K.; Callaway, H.; Elgar, G.; Grzeschik, K. H., Human *GLI3* Intragenic Conserved Non-Coding Sequences Are Tissue-Specific Enhancers. *PLoS One*, **2007**, 2, (4).
- [36] Drissen, R.; Guyot, B.; Zhang, L.; Atzberger, A.; Sloane-Stanley, J.; Wood, B.; Porcher, C.; Vyas, P., Lineage-specific combinatorial action of enhancers regulates mouse erythroid *Gata1* expression. *Blood*, 115, (17), 3463-3471.
- [37] Rojas, A.; De Val, S.; Heidt, A. B.; Xu, S. M.; Bristow, J.; Black, B. L., *Gata4* expression in lateral mesoderm is downstream of *BMP4* and is activated directly by Forkhead and GATA transcription factors through a distal enhancer element. *Development*, **2005**, 132, (15), 3405-3417.
- [38] Schachterle, W.; Rojas, A.; Xu, S. M.; Black, B. L., ETS-dependent regulation of a distal *Gata4* cardiac enhancer. *Dev. Biol.*, 361, (2), 439-449.
- [39] Rojas, A.; Schachterle, W.; Xu, S. M.; Black, B. L., An Endoderm-Specific Transcriptional Enhancer from the Mouse *Gata4* Gene Requires GATA and Homeodomain Protein-Binding Sites for Function In Vivo. *Dev. Dyn.*, **2009**, 238, (10), 2588-2598.
- [40] Guittot, S. M.; Tetu, A.; Legault, E.; Pilon, N.; Silversides, D. W.; Viger, R. S., The proximal *Gata4* promoter directs reporter gene expression to Seroli cells during mouse gonadal development. *Biol. Reprod.*, **2007**, 76, (1), 85-95.
- [41] Nakano, T.; Windrem, M.; Zappavigna, V.; Goldman, S. A., Identification of a conserved 125 base-pair *Hb9* enhancer that specifies gene expression to spinal motor neurons. *Dev. Biol.*, **2005**, 283, (2), 474-485.
- [42] Frasch, M.; Chen, X.; Lufkin, T., Evolutionary-conserved enhancers direct region-specific expression of the murine *Hoxa-1* and *Hoxa-2* loci in both mice and *Drosophila*. *Development*, **1995**, 121, 957-974.
- [43] Nonchev, S.; Vesque, C.; Maconochie, M.; Seitaniidou, T.; Ariza-McNaughton, L.; Frain, M.; Marshall, H.; Sham, M. H.; Krumlauf, R.; Charnay, P., Segmental expression of *Hoxa-2* in the hindbrain is directly regulated by *Krox-20*. *Development*, **1996**, 122, (2), 543-54.
- [44] Tumpel, S.; Cambronero, F.; Sims, C.; Krumlauf, R.; Wiedemann, L. M., A regulatory module embedded in the coding region of *Hoxa2* controls expression in rhombomere 2. *Proc. Natl. Acad. Sci. USA*, **2008**, 105, (51), 20077-20082.
- [45] Manzanares, M.; Bel-Vialar, S.; Ariza-McNaughton, L.; Ferretti, E.; Marshall, H.; Maconochie, M. M.; Blasi, F.; Krumlauf, R., Independent regulation of initiation and maintenance phases of *Hoxa3* expression in the vertebrate hindbrain involve auto- and crossregulatory mechanisms. *Development*, **2001**, 128, (18), 3595-3607.
- [46] Knittel, T.; Kessel, M.; Kim, M. H.; Gruss, P., A conserved enhancer of the human and murine *Hoxa-7* gene specifies the anterior boundary of expression during embryonic development. *Development*, **1995**, 121, (4), 1077-88.
- [47] Langston, A. W.; Thompson, J. R.; Gudas, L. J., Retinoic acid-responsive enhancers located 3' of the *Hox A* and *Hox B* homeobox gene clusters. Functional analysis. *J. Biol. Chem.*, **1997**, 272, (4), 2167-75.
- [48] Kwan, C. T.; Tsang, S. L.; Krumlauf, R.; Sham, M. H., Regulatory analysis of the mouse *Hoxb3* gene: multiple elements work in concert to direct temporal and spatial patterns of expression. *Dev. Biol.*, **2001**, 232, 176-190.
- [49] Yau, T. O.; Kwan, C. T.; Jakt, L. M.; Stallwood, N.; Cordes, S.; Sham, M. H., Auto/cross-regulation in posterior Hindbrain of *Hoxb3* expression and

- spinal cord. *Dev. Biol.*, **2002**, 252, (2), 287-300.
- [50] Whiting, J.; Marshall, H.; Cook, M.; Krumlauf, R.; Rigby, P. W. J.; Stott, D.; Alleman, R. K., Multiple spatially specific enhancers are required to reconstruct the pattern of hox-2.6 gene-expression. *Genes Dev.*, **1991**, 5, (11), 2048-2059.
- [51] Gould, A.; Itasaki, N.; Krumlauf, R., Initiation of rhombomeric Hoxb4 expression requires induction by somites and a retinoid pathway. *Neuron*, **1998**, 21, (1), 39-51.
- [52] Becker, D.; Jiang, Z.; Knodler, P.; Deinard, A. S.; Eid, R.; Kidd, K. K.; Shashikant, C. S.; Ruddle, F. H.; Schughart, K., Conserved regulatory element involved in the early onset of Hoxb6 gene expression. *Dev. Dyn.*, **1996**, 205, (1), 73-81.
- [53] Shashikant, C. S.; Bieberich, C. J.; Belting, H. G.; Wang, J. C.; Borbely, M. A.; Ruddle, F. H., Regulation of Hoxc-8 during mouse embryonic development: identification and characterization of critical elements involved in early neural tube expression. *Development*, **1995**, 121, (12), 4339-47.
- [54] Papenbrock, T.; Peterson, R. L.; Lee, R. S.; Hsu, T.; Kuroiwa, A.; Awgulewitsch, A., Murine Hoxc-9 gene contains a structurally and functionally conserved enhancer. *Dev. Dyn.*, **1998**, 212, 540-547.
- [55] Popperl, H.; Featherstone, M. S., AN AUTOREGULATORY ELEMENT OF THE MURINE HOX-4.2 GENE. *EMBO J.*, **1992**, 11, (10), 3673-3680.
- [56] Zhang, F.; Kovacs, E. N.; Featherstone, M. S., Murine Hoxd4 expression in the CNS requires multiple elements including a retinoic acid response element. *Mechanisms of Development*, **2000**, 96, (1), 79-89.
- [57] MacKenzie, A.; Purdie, L.; Davidson, D.; Collinson, M.; Hill, R. E., Two enhancer domains control early aspects of the complex expression pattern of Msx1. *Mechanisms of Development*, **1997**, 62, (1), 29-40.
- [58] Brugger, S. M.; Merrill, A. E.; Torres-Vazquez, J.; Wu, N.; Ting, M. C.; Cho, J. Y. M.; Dobias, S. L.; Yi, S. E.; Lyons, K.; Bei, J. R.; Arora, K.; Warrior, R.; Maxson, R., A phylogenetically conserved cis-regulatory module in the Msx2 promoter is sufficient for BMPdependent transcription in murine and Drosophila embryos. *Development*, **2004**, 131, (20), 5153-5165.
- [59] Cheng, H. C.; Wang, C. K. L.; Upholt, W. B., Transcriptional regulation of Msx2 in the AERs of developing limbs is dependent on multiple closely spaced regulatory elements. *Dev. Biol.*, **2004**, 270, (2), 513-524.
- [60] Summerbell, D.; Ashby, P. R.; Coutelle, O.; Cox, D.; Yee, S. P.; Rigby, P. W. J., The expression of Myf5 in the developing mouse embryo is controlled by discrete and dispersed enhancers specific for particular populations of skeletal muscle precursors. *Development*, **2000**, 127, (17), 3745-3757.
- [61] Hadchouel, J.; Tajbakhsh, S.; Primig, M.; Chang, T. H. T.; Daubas, P.; Rocancourt, D.; Buckingham, M., Modular long-range regulation of Myf5 reveals unexpected heterogeneity between skeletal muscles in the mouse embryo. *Development*, **2000**, 127, (20), 4455-4467.
- [62] Buchberger, A.; Nomokonova, N.; Arnold, H. H., Myf5 expression in somites and limb buds of mouse embryos is controlled by two distinct distal enhancer activities. *Development* **2003**, 130, (14), 3297-3307.
- [63] Carvajal, J. J.; Cox, D.; Summerbell, D.; Rigby, P. W. J., A BAC transgenic analysis of the Mrf4/Myf5 locus reveals interdigitated elements that control activation and maintenance of gene expression during muscle development. *Development*, **2001**, 128, (10), 1857-1868.
- [64] Fomin, M.; Nomokonova, N.; Arnold, H. H., Identification of a critical control element directing expression of the muscle-specific transcription factor MRF4 in the mouse embryo. *Dev. Biol.*, **2004**, 272, (2), 498-509.
- [65] Chang, T. H. T.; Primig, M.; Hadchouel, J.; Tajbakhsh, S.; Rocancourt, D.; Fernandez, A.; Kappler, R.; Scherthan, H.; Buckingham, M., An enhancer directs differential expression of the linked Mrf4 and Myf5 myogenic regulatory genes in the mouse. *Dev. Biol.*, **2004**, 269, (2), 595-608.
- [66] Reecy, J. M.; Li, X. Y.; Yamada, M.; DeMayo, F. J.; Newman, C. S.; Harvey, R. P.; Schwartz, R. J., Identification of upstream regulatory regions in the heart-expressed homeobox gene Nkx2-5. *Development*, **1999**, 126, (4), 839-849.
- [67] Adachi, H.; Saijoh, Y.; Mochida, K.; Ohishi, S.; Hashiguchi, H.; Hirao, A.; Hamada, H., Determination of left right asymmetric expression of nodal by a left side-specific enhancer with sequence similarity to a lefty-2 enhancer. *Genes Dev.*, **1999**, 13, (12), 1589-1600.
- [68] Saijoh, Y.; Oki, S.; Tanaka, C.; Nakamura, T.; Adachi, H.; Yan, Y. T.; Shen, M. M.; Hamada, H., Two nodal-responsive enhancers control left-right asymmetric expression of Nodal. *Dev. Dyn.*, **2005**, 232, (4), 1031-1036.
- [69] Okazawa, H.; Okamoto, K.; Ishino, F.; Ishinokane, T.; Takeda, S.; Toyoda, Y.; Muramatsu, M.; Hamada, H., THE OCT3 GENE, A GENE FOR AN EMBRYONIC TRANSCRIPTION FACTOR, IS CONTROLLED BY A RETINOIC ACID REPRESSIBLE ENHANCER. *EMBO J.*, **1991**, 10, (10), 2997-3005.
- [70] Kimura, C.; Takeda, N.; Suzuki, M.; Oshimura, M.; Aizawa, S.; Matsuo, I., Cis-acting elements conserved between mouse and pufferfish Otx2 genes govern the expression in mesencephalic neural crest cells. *Development*, **1997**, 124, (20), 3929-3941.
- [71] Kurokawa, D.; Kiyonari, H.; Nakayama, R.; Kimura-Yoshida, C.; Matsuo, I.; Aizawa, S., Regulation of Otx2 expression and its functions in mouse forebrain and midbrain. *Development*, **2004**, 131, (14), 3319-3331.
- [72] Kammandel, B.; Chowdhury, K.; Stoykova, A.; Aparicio, S.; Brenner, S.; Gruss, P., Distinct cis-essential modules direct the time-space pattern of the Pax6 gene activity. *Dev. Biol.*, **1999**, 205, 79-97.
- [73] Xu, Z. P.; Saunders, G. F., PAX6 intronic sequence targets expression to the spinal cord. *Dev. Genet.*, **1998**, 23, (4), 259-63.
- [74] Xu, P. X.; Zhang, X.; Heaney, S.; Yoon, A.; Michelson, A. M.; Maas, R. L., Regulation of Pax6 expression is conserved between mice and flies. *Development*, **1999**, 126, (2), 383-95.
- [75] Kleinjan, D.; Seawright, A.; Childs, A.; van Heyningen, V., Conserved elements in Pax6 intron 7 involved in (auto)regulation and alternative transcription. *Dev. Biol.*, **2004**, 265, 462-477.
- [76] Sato, S.; Ikeda, K.; Shioi, G.; Ochi, H.; Ogino, H.; Yajima, H.; Kawakami, K., Conserved expression of mouse Six1 in the pre-placodal region (PPR) and identification of an enhancer for the rostral PPR. *Dev. Biol.*, **2010**, 344, (1), 158-171.
- [77] Goke, J.; Jung, M.; Behrens, S.; Chavez, L.; O'Keefe, S.; Timmermann, B.; Lehrach, H.; Adjaye, J.; Vingron, M., Combinatorial Binding in Human and Mouse Embryonic Stem Cells Identifies Conserved Enhancers Active in Early Embryonic Development. *PLoS Comput. Biol.*, **7**, (12).
- [78] Antonellis, A.; Huynh, J. L.; Lee-Lin, S. Q.; Vinton, R. M.; Renaud, G.; Loftus, S. K.; Elliot, G.; Wolfsberg, T. G.; Green, E. D.; McCallion, A. S.; Pavan, W. J., Identification of Neural Crest and Glial Enhancers at the Mouse Sox10 Locus through Transgenesis in Zebrafish. *PLoS Genet.*, **2008**, 4, (9).
